# Supplementary material
Source: PubMed Central journal article supplement (PMC4106638)

## Supplemental Methods

### Cardiac biochemical tissue measurements

Four different lysis buffer solutions were used for different biochemical assays and western blotting including (1) Lysis Buffer A (15mM Tris-HCl, 150 nmol/L NaCl, 1% Triton-X-100, 5mmol/L EDTA, 1mM CaCl<sub>2</sub>, 1mM MgCl-H<sub>2</sub>O, and 100ug/ml of Protease Inhibitor Cocktail [Sigma-Aldrich P8340; Saint Louis, MO]); (2) Lysis Buffer B (phosphate buffered saline containing 0.01% Triton X-100, 0.1% SDS, and 1mM Protease Inhibitor Cocktail); (3) Lysis Buffer C (phosphate buffered saline containing 0.1% Triton-X-100); & (4) Lysis Buffer D (phosphate buffered saline containing 2% SDS, 10mmol/L Tris-HCL, 10% [vol/vol] glycerol, and 1mM Protease Inhibitor Cocktail). Tissue lysates were centrifuged at 10,000g for 10 minutes at 4°C and the supernatant was used for analysis. Protein concentration was determined using the Bradford method, and tissue lysates were stored at -80°C. Cardiac NO substrate/production and nitrotyrosine were measured in LV tissue samples in Lysis Buffer A, and LV H<sub>2</sub>O<sub>2</sub> was measured following homogenization in Lysis Buffer C.

*Western Blotting.* LV tissue samples resuspended in laemmli sample buffer (Bio-Rad Laboratories, Inc.; Hercules, CA) were separated by electrophoresis and transferred to nitrocellulose membranes (1h, 50V) that were subsequently blocked overnight at 4°C (5%-nonfat dry milk in Tris-buffered saline and 0.1%-Tween-20). The membranes were then probed for proteins of interest (see *Supplemental Table 1*) and stained with ECL detection reagents (GE Healthcare; Pittsburgh PA) for development. All western blots were digitized and analyzed using Image J software. Protein abundance is expressed as relative units normalized to β-actin (1:1000-1:5000; Santa Cruz Biotechnology; Santa Cruz, CA) and a control sample loaded into each gel. No differences were observed between groups while conducting control analysis of β-actin ( $p>0.05$ ), and exposure times fell within the linear portion of β-actin standard curves (band intensity vs. time).

## Supplemental Figure Legends

### Supplemental Figure 1

Representative color images of periodic acid schiff stained glomeruli with each grade of sclerosis including grade 0 (normal) (A), grade 1 ( $\leq 25\%$  sclerotic area; minimal sclerosis) (B), grade 2 (25-50% sclerotic area; moderate sclerosis) (C), grade 3 (50-75% sclerotic area; moderate-to-severe sclerosis) (D), and grade 4 ( $\geq 75\%$  sclerosis; severe sclerosis) (E). Images were taken at 200X magnification; — 100 $\mu\text{m}$ .

### Supplemental Figure 2

Heart rate (**A**), stroke volume (**B**), rate pressure product (HR X SP; **C**), and stroke work (SP X SV; **D**) in sham (n = 8) and AI (n = 7) animals able to withstand the 15 min ischemic bout (i.e. achieve aortic overflow post-ischemia) during the course of the ischemia-reperfusion perturbation at 5, 10, and 15 min pre-ischemia as well as 20, 25, and 30 min post-ischemia. Heart rate and rate pressure product were not significantly reduced in AI relative to sham post-ischemia at any of the time points. In contrast, stroke volume and stroke work were impaired post-ischemia in AI. AI, 5/6 ablation-infarction animals, \*p<0.05 vs. sham; #p<0.05 vs. 15 minute pre-ischemia time-point

## Tables

Table S1. Western blotting conditions and antibodies used.

| Protein  | Lysis Buffer | % Acrylamide gel | Electrophoresis conditions | Amt of Protein Loaded ( $\mu$ g) | Primary antibody/dilution | Secondary antibody/dilution                   |
|----------|--------------|------------------|----------------------------|----------------------------------|---------------------------|-----------------------------------------------|
| eNOS     | B            | 10               | 100 V, 75 min              | 20                               | BD Pharmingen, 1:200      | Rabbit anti-mouse (Abcam 6728); 1:2000        |
| Nox-4    | D            | 10               | 100 V, 60 min              | 50                               | Santa Cruz, 1:500         | Donkey anti-goat (Santa Cruz Sc-2020); 1:2000 |
| Nox-2    | D            | 10               | 100 V, 60 min              | 50                               | Santa Cruz, 1:500         | Rabbit anti-mouse (Abcam 6728); 1:2000        |
| SOD-1    | A            | 15               | 100 V, 60 min              | 10                               | Santa Cruz, 1:500         | Rabbit anti-mouse (Abcam 6728); 1:2000        |
| SOD-2    | A            | 15               | 100 V, 60 min              | 10                               | Santa Cruz, 1:500         | Rabbit anti-mouse (Abcam 6728); 1:2000        |
| GPx-1/2  | A            | 15               | 100 V, 60 min              | 10                               | Santa Cruz, 1:500         | Rabbit anti-mouse (Abcam 6728); 1:2000        |
| Catalase | A            | 15               | 100 V, 60 min              | 10                               | Santa Cruz, 1:1500        | Rabbit anti-mouse (Abcam 6728); 1:2000        |

eNOS, endothelial nitric oxide synthase; NADPH-oxidase isoform-4, Nox-4; NADPH-oxidase isoform-2, Nox-2; superoxide dismutase-1, SOD-1, superoxide dismutase-2, SOD-2; glutathione peroxidase homologs 1/2, GPx-1/2

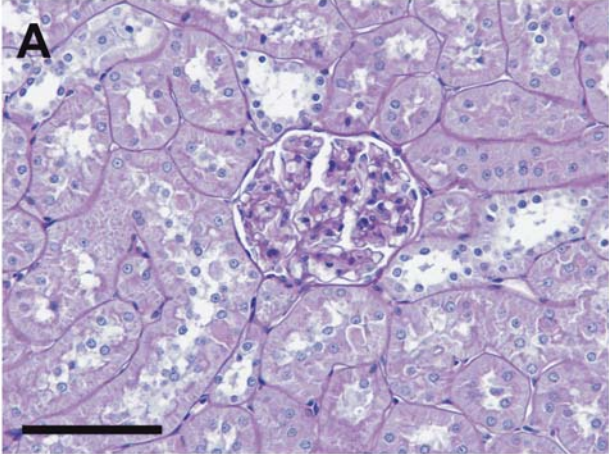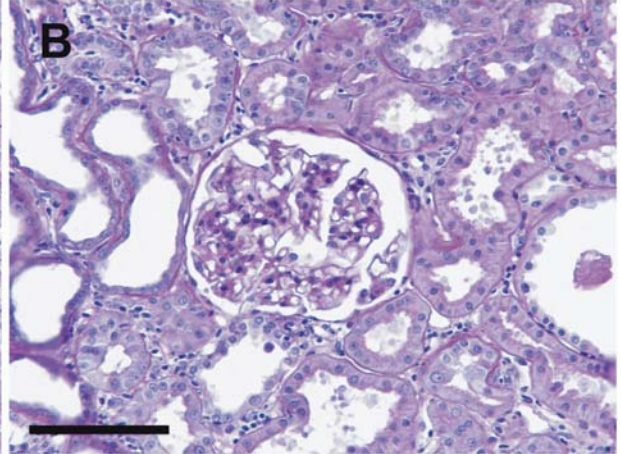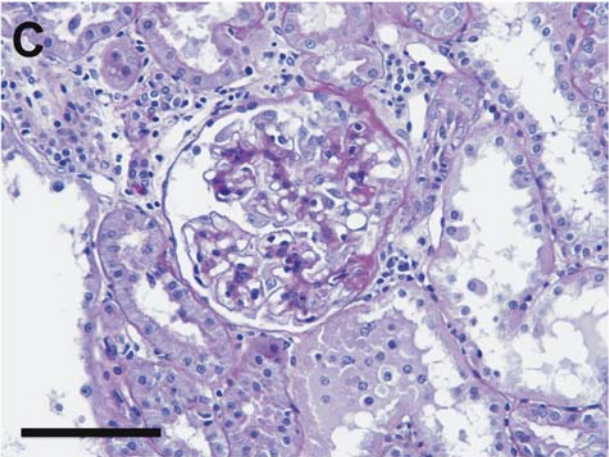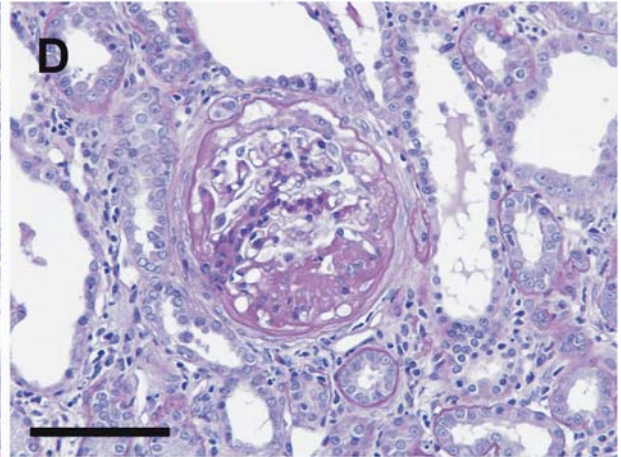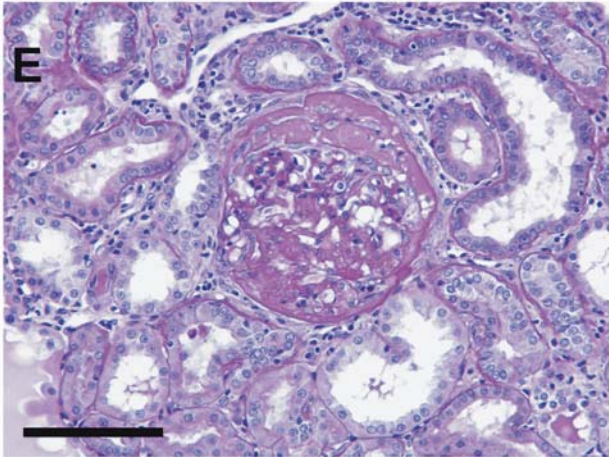

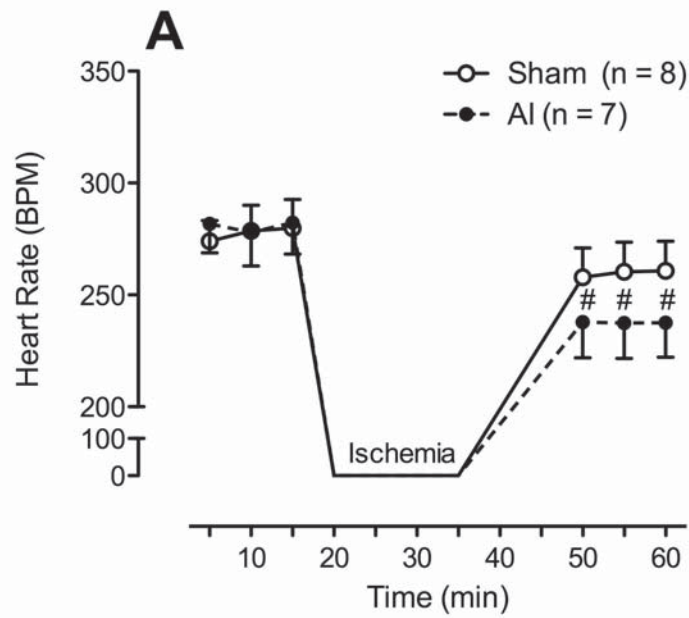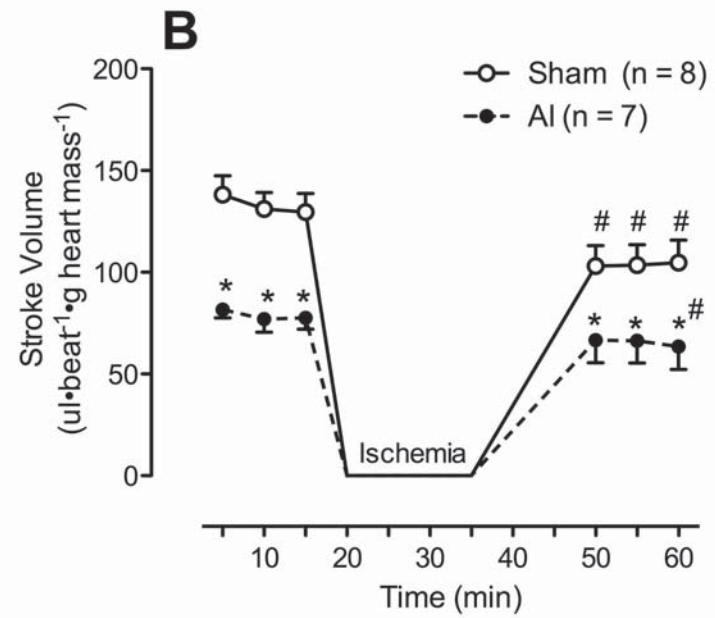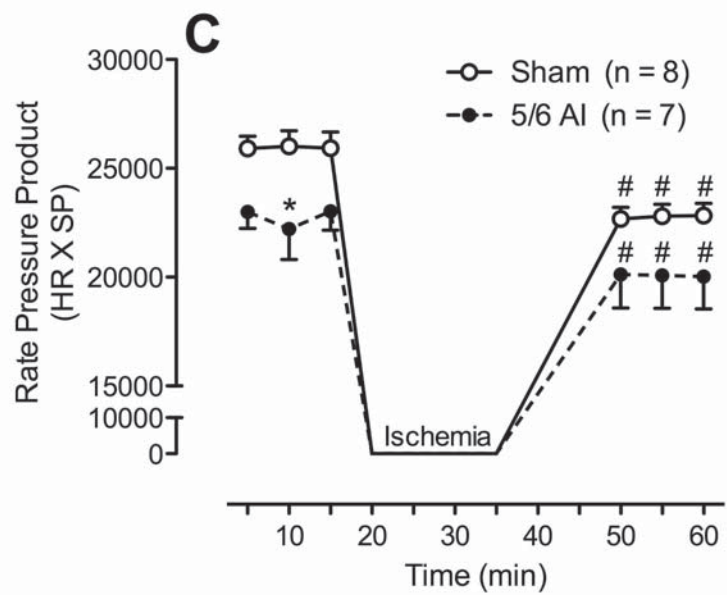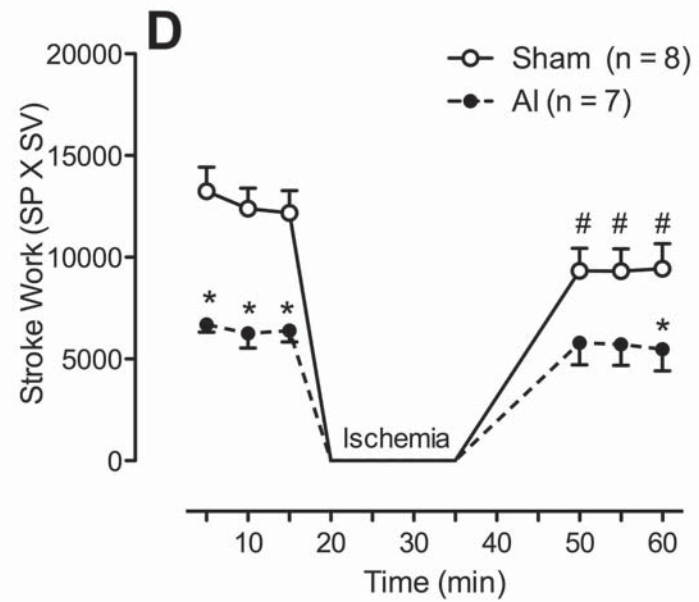

Supplement: supp_gft336_gft336supp.pdf [file supp_gft336_gft336supp.pdf]
